# Supplementary material for: Trends in educational inequalities in obesity in 15 European countries between 1990 and 2010
Source: Springer Nature journal article supplement (doi:10.1186/s12966-017-0517-8), 2017-05-08
Supplement: MOESM1 [file 12966_2017_517_MOESM1_ESM.pdf]

## **Trends in educational inequalities in obesity in 15 European countries between 1990 and 2010**

Kristina Hoffmann<sup>1,2</sup>, Rianne De Gelder<sup>1</sup>, Yannan Hu<sup>1</sup>, Matthias Bopp<sup>3</sup>, Jozsef Vitrai<sup>4</sup>, Eero Lahelma<sup>5</sup>, Gwenn Menvielle<sup>6</sup>, Paula Santana<sup>7</sup>, Enrique Regidor<sup>8</sup>, Ola Ekholm<sup>9</sup>, Johan P. Mackenbach<sup>1</sup>, Frank J. van Lenthe<sup>1</sup>

<sup>1</sup>Department of Public Health, Erasmus MC, University Medical Center Rotterdam, The Netherlands

<sup>2</sup>Mannheim Institute of Public Health, Social and Preventive Medicine, Medical Faculty Mannheim, Heidelberg University, Mannheim, Germany

<sup>3</sup>Epidemiology, Biostatistics and Prevention Institute, University of Zürich, Switzerland

<sup>4</sup>National Institute for Health Development, Budapest, Hungary

<sup>5</sup>Department of Public Health, University of Helsinki, Helsinki, Finland

<sup>6</sup>Sorbonne Universités, INSERM, Institut Pierre Louis d'Epidémiologie et de Santé Publique (IPLESP UMRS 1136), Paris, France

<sup>7</sup>Departamento de Geografia, Centro de Estudos de Geografia e de Ordenamento do Território (CEGOT), Colégio de S. Jerónimo, Universidade de Coimbra, Coimbra, Portugal

<sup>8</sup>Department of Preventive Medicine and Public Health, Universidad Complutense de Madrid, Madrid, Spain

<sup>9</sup>National Institute of Public Health, Copenhagen, Denmark

### **Supplement 1**

Supplement 1 contains the results for trends in obesity prevalence for the low- and high-educated groups separately. The analysis was performed according to the method section described in the main manuscript.

### Trends in prevalence of obesity in males Low-educated group

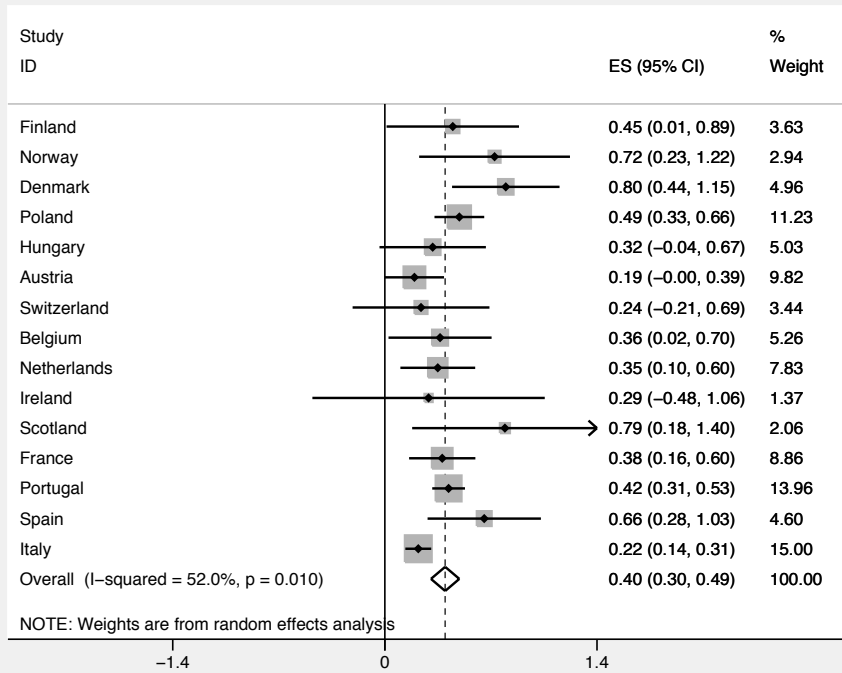

**Figure S1a:** Forest plot of meta-regression slopes for trends in prevalence of obesity (BMI  $\geq 30$  kg/m<sup>2</sup>) in low-educated men. ES, effect estimator (% points change of obesity prevalence per year); CI, confidence interval.

### Trends in prevalence of obesity in males High-educated group

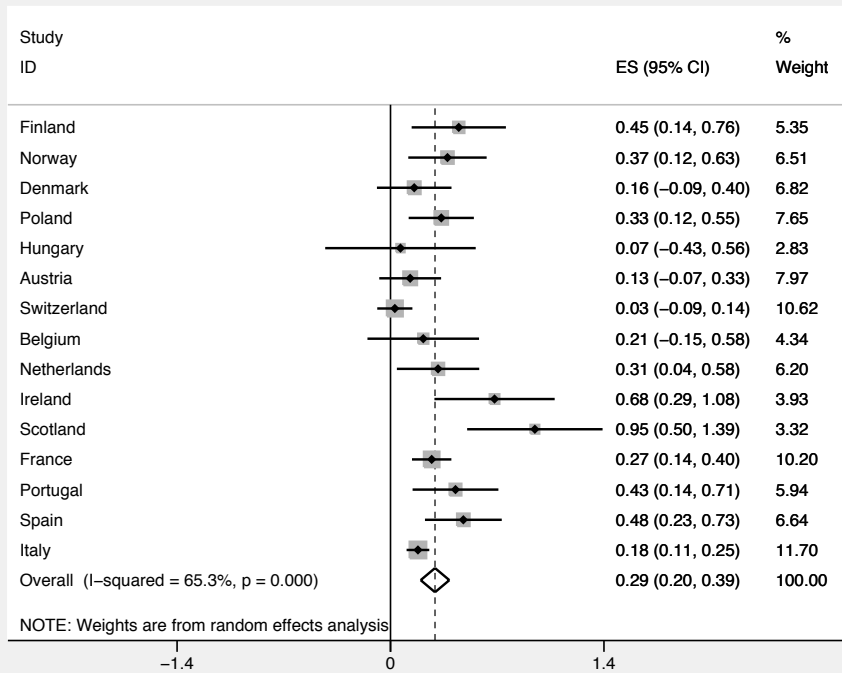

**Figure S1b:** Forest plot of meta-regression slopes for trends in prevalence of obesity (BMI  $\geq 30$  kg/m<sup>2</sup>) in high-educated men. ES, effect estimator (% points change of obesity prevalence per year); CI, confidence interval.

### Trends in prevalence of obesity in females Low-educated group

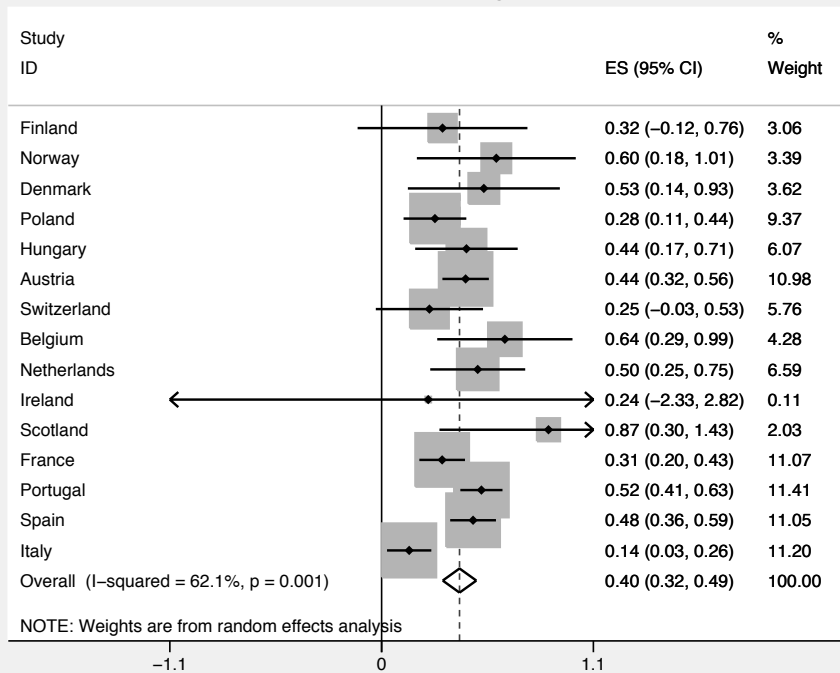

**Figure S1c:** Forest plot of meta-regression slopes for trends in prevalence of obesity (BMI  $\geq 30$  kg/m<sup>2</sup>) in low-educated women. ES, effect estimator (% points change of obesity prevalence per year); CI, confidence interval.

### Trends in prevalence of obesity in females High-educated group

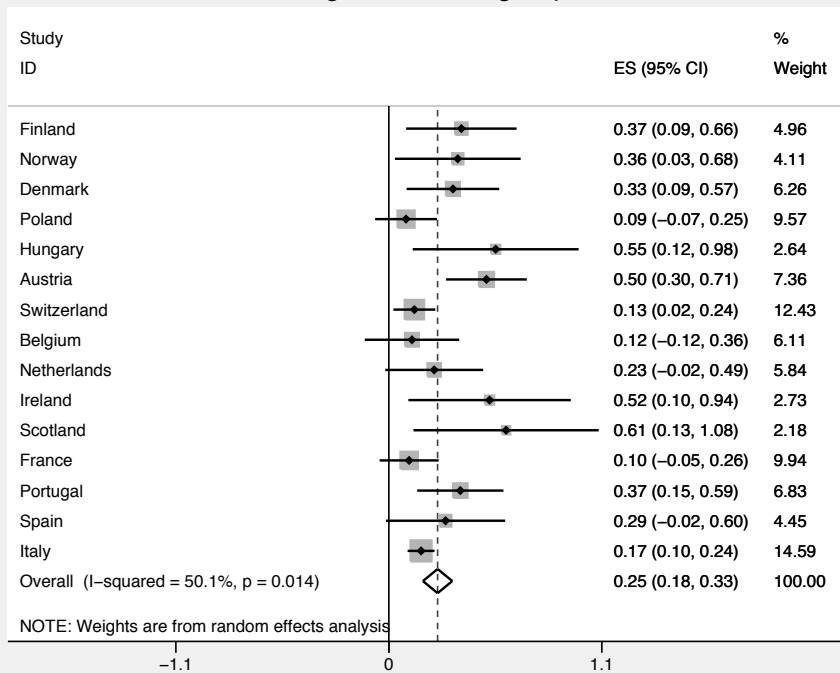

**Figure S1d:** Forest plot of meta-regression slopes for trends in prevalence of obesity (BMI  $\geq 30$  kg/m<sup>2</sup>) in high-educated women. ES, effect estimator (% points change of obesity prevalence per year); CI, confidence interval.
